# Supplementary material for: Differential left ventricular and left atrial remodelling in heart failure with preserved ejection fraction patients with and without diabetes
Source: PubMed Central journal article supplement — Ther Adv Endocrinol Metab. 2019 Jul 5;10:2042018819861593. doi: 10.1177/2042018819861593 (PMC6613057; doi:10.1177/2042018819861593), 2019-07-05
Supplement: Online_Only_Supplemental_Material_TAE.pdf [file Online_Only_Supplemental_Material_TAE.pdf]

**Supplemental Table 1.** Multivariable predictors of LV concentric remodelling (LV mass/volume)

|                     | <b>Standardised coefficient (<math>\beta</math>)</b> | <b>95% CI</b>  | <b>p-value</b>   |
|---------------------|------------------------------------------------------|----------------|------------------|
| <b>Age</b>          | 0.136                                                | 0.000 – 0.005  | 0.091            |
| <b>Gender</b>       | 0.367                                                | 0.069 – 0.165  | <b>&lt;0.001</b> |
| <b>Ethnicity</b>    | 0.240                                                | 0.035 – 0.161  | <b>0.003</b>     |
| <b>T2D</b>          | 0.194                                                | 0.009 – 0.115  | <b>0.023</b>     |
| <b>Hypertension</b> | 0.139                                                | -0.006 – 0.159 | 0.070            |
| <b>BMI</b>          | 0.153                                                | 0.000 - 0.007  | 0.070            |

Abbreviations: T2D=type 2 diabetes, BMI=body mass index.

**Supplemental Table 2.** Correlations between plasma biomarkers, LV mass/volume and LA volume.

|               | LV mass/volume                        |                  | Maximal indexed LA volume             |                  |
|---------------|---------------------------------------|------------------|---------------------------------------|------------------|
|               | Pearson's correlation coefficient (r) | p-value          | Pearson's correlation coefficient (r) | p-value          |
| FABP4         | 0.082                                 | 0.366            | -0.146                                | 0.096            |
| Adiponectin   | -0.328                                | <b>&lt;0.001</b> | 0.291                                 | <b>0.001</b>     |
| Interleukin-6 | 0.063                                 | 0.486            | 0.034                                 | 0.700            |
| Interleukin-8 | 0.024                                 | 0.791            | 0.043                                 | 0.623            |
| TNFR1         | 0.249                                 | <b>0.005</b>     | -0.018                                | 0.841            |
| Serpine1 PAI1 | 0.073                                 | 0.416            | -0.352                                | <b>&lt;0.001</b> |
| GDF15         | 0.273                                 | <b>0.002</b>     | 0.052                                 | 0.554            |
| MMP7          | 0.221                                 | <b>0.013</b>     | 0.002                                 | 0.983            |
| TIMP1         | 0.079                                 | 0.381            | -0.066                                | 0.456            |

Abbreviations: FABP4=fatty acid binding protein 4, TNFR1=tumour necrosis factor receptor 1, Serpin E1 PAI1=SerpinE1 plasminogen activator inhibitor 1, GDF15=growth differentiation factor 15, MMP7=matrix metalloproteinase 7, TIMP1=tissue inhibitor of metalloproteinases 1.
